# Supplementary material for: ER stress upregulated PGE2/IFNγ-induced IL-6 expression and down-regulated iNOS expression in glial cells
Source: PubMed Central journal article supplement — Sci Rep. 2013 Dec 2;3:3388. doi: 10.1038/srep03388 (PMC3844943; doi:10.1038/srep03388), 2013-12-02
Supplement: srep03388-s1.pdf [file srep03388-s1.pdf]

# Supplementary Information for

## **ER stress upregulated PGE<sub>2</sub>/IFN $\gamma$ -induced IL-6 expression and down-regulated iNOS expression in glial cells**

Toru Hosoi, Miya Honda, Tatsuya Oba, and Koichiro Ozawa

*Department of Pharmacotherapy, Graduate School of Biomedical and Health Sciences, Hiroshima University, 1-2-3 Kasumi, Minami-ku, Hiroshima 734-8551, Japan*

Supplementary Information includes:  
Supplementary Figures S1 to S6

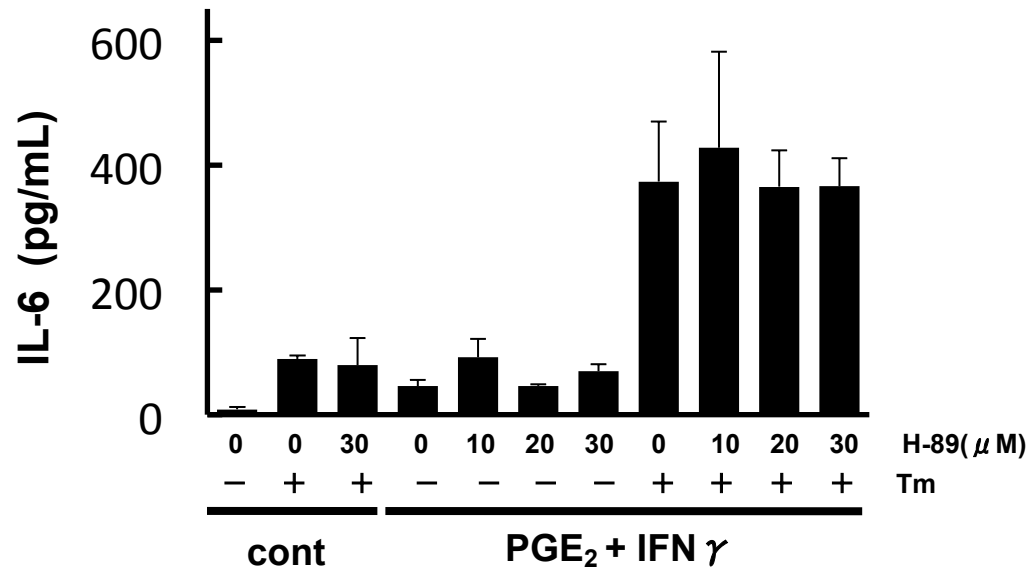

Supplementary Figure S1. Effect of a PKA inhibitor on PGE<sub>2</sub>+IFN $\gamma$ -induced IL-6 release.

Mouse primary cultured glial cells were pre-treated with H-89 (10,20,30 μM) for 0.5 h, were then treated with tunicamycin (Tm: 1 μg/mL) for 1 h, and were finally stimulated with prostaglandin E<sub>2</sub> (PGE<sub>2</sub>: 15 μM) + interferon  $\gamma$  (IFN $\gamma$ : 20 ng/mL) for 24 h. IL-6 protein levels were detected by ELISA. H-89 did not inhibit PGE<sub>2</sub> + IFN $\gamma$  or PGE<sub>2</sub> + IFN $\gamma$  + Tm-induced IL-6 release. n=5~6.

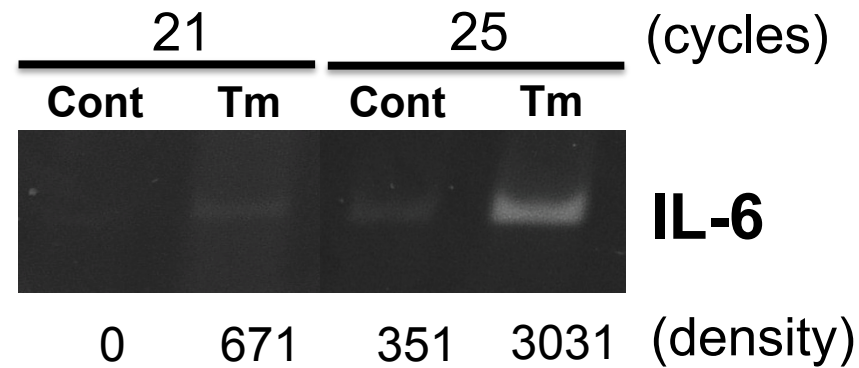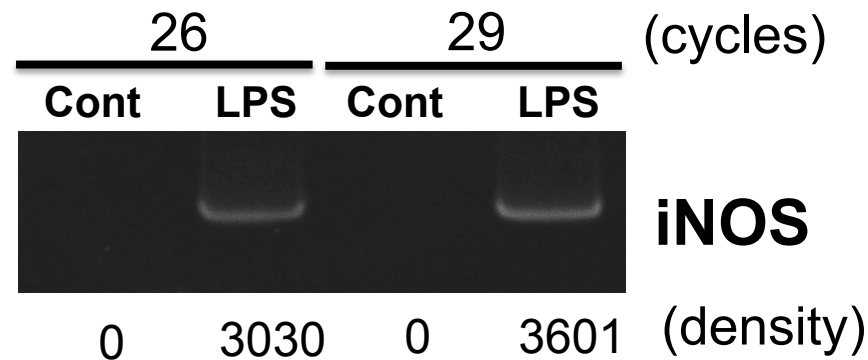

Supplementary Figure S2. PCR cycle analysis of IL-6 and iNOS mRNA levels in mouse primary cultured glial cells. IL-6 levels were measured with or without tunicamycin (Tm) for 5 h. iNOS levels were measured with or without LPS for 4 h. mRNA levels increased depending on the cycles and stimulations. The density of each band was measured using Image J 1.37v.

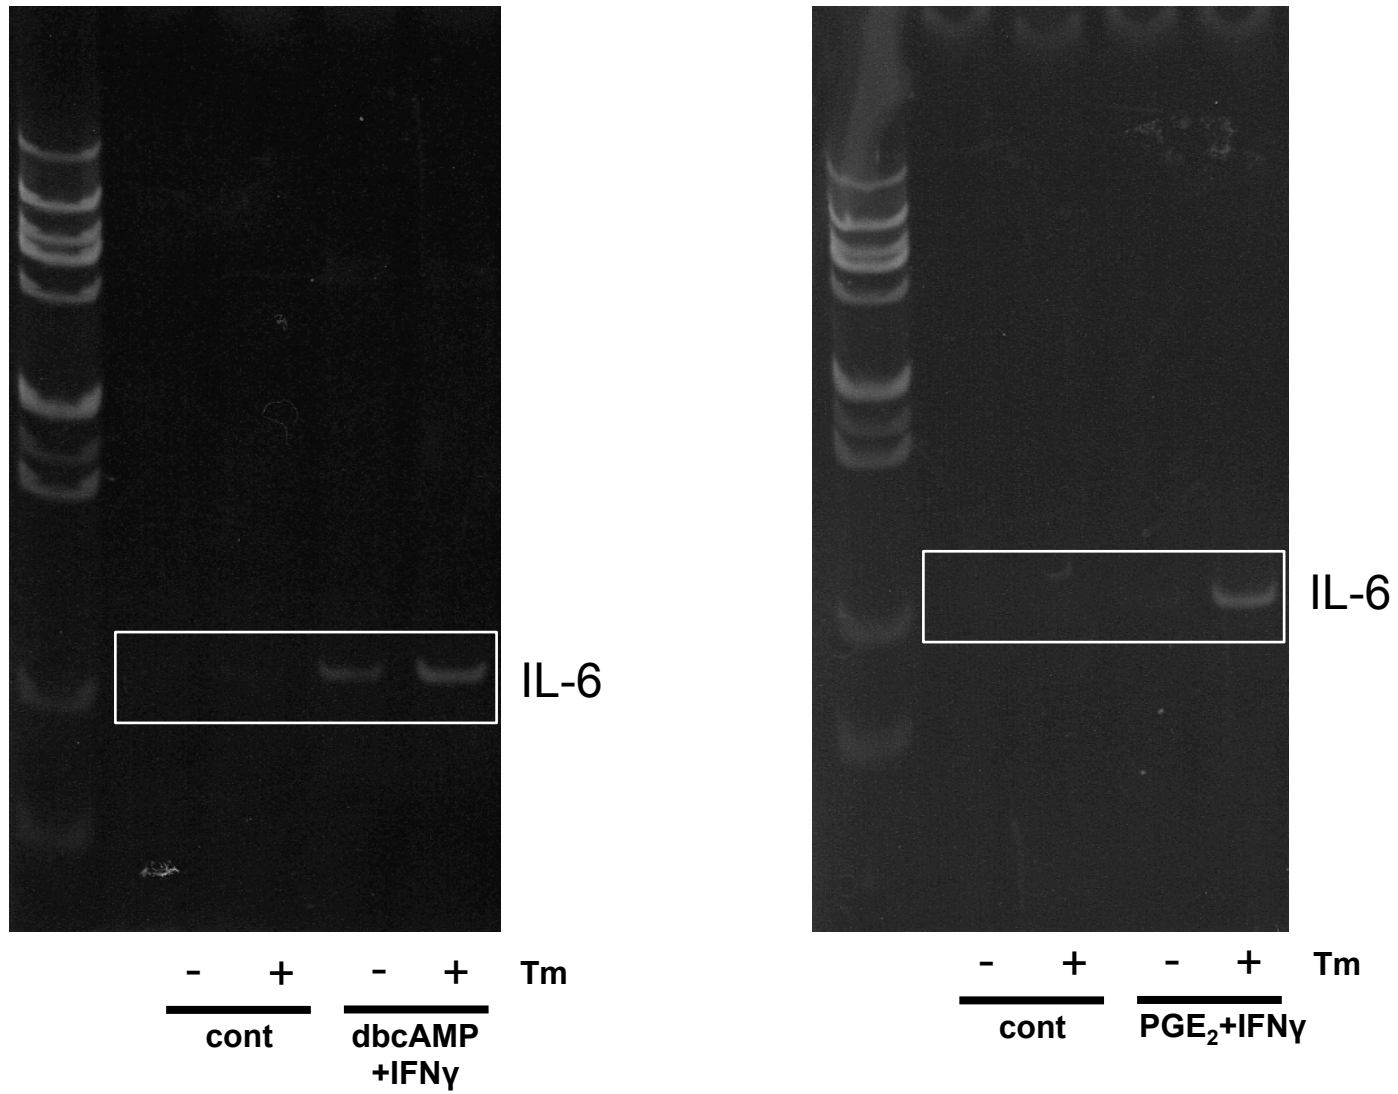

Supplementary Figure S3 Full-length unedited blots for Figure 2B and 3D.

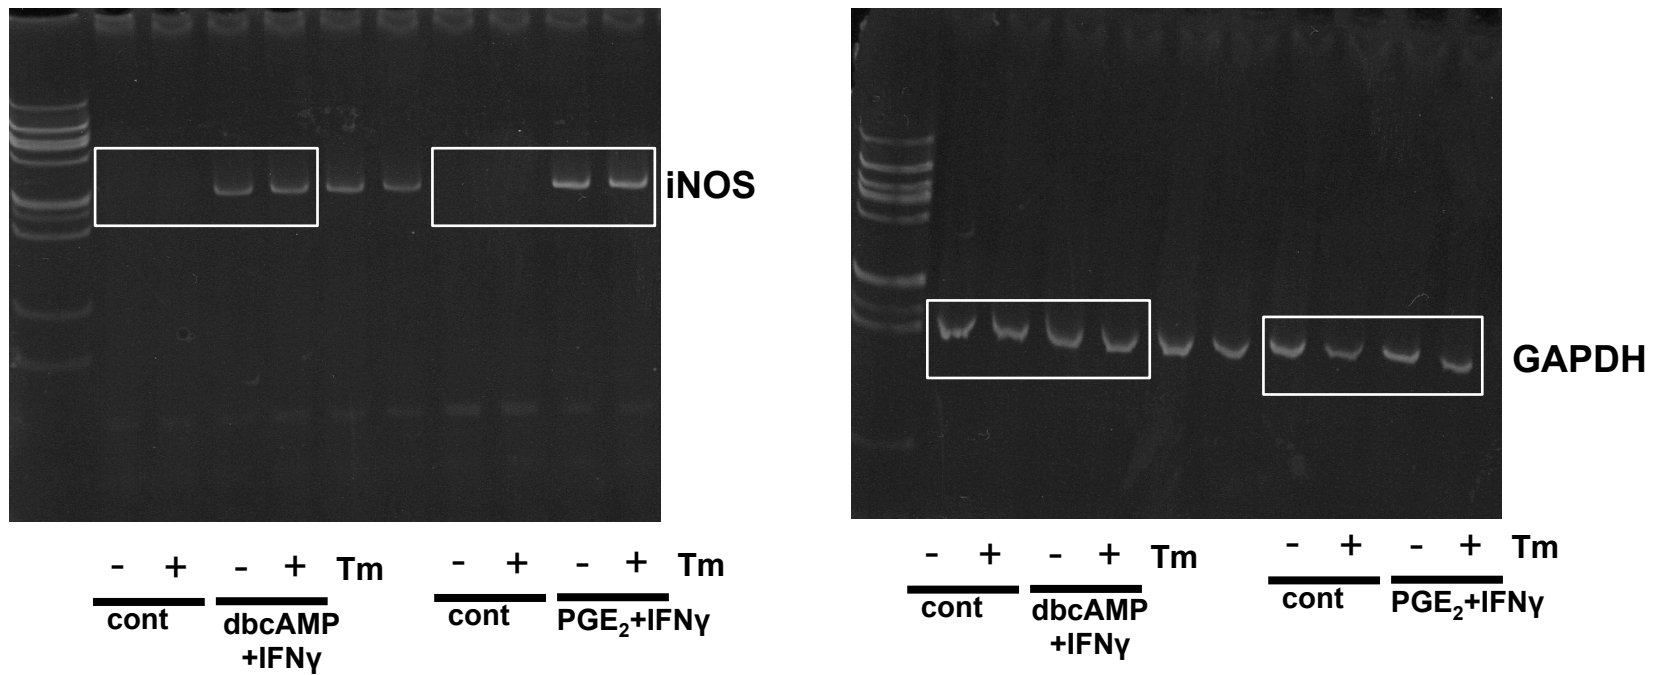

Supplementary Figure S4 Full-length unedited blots for Figure 4B and 5B.

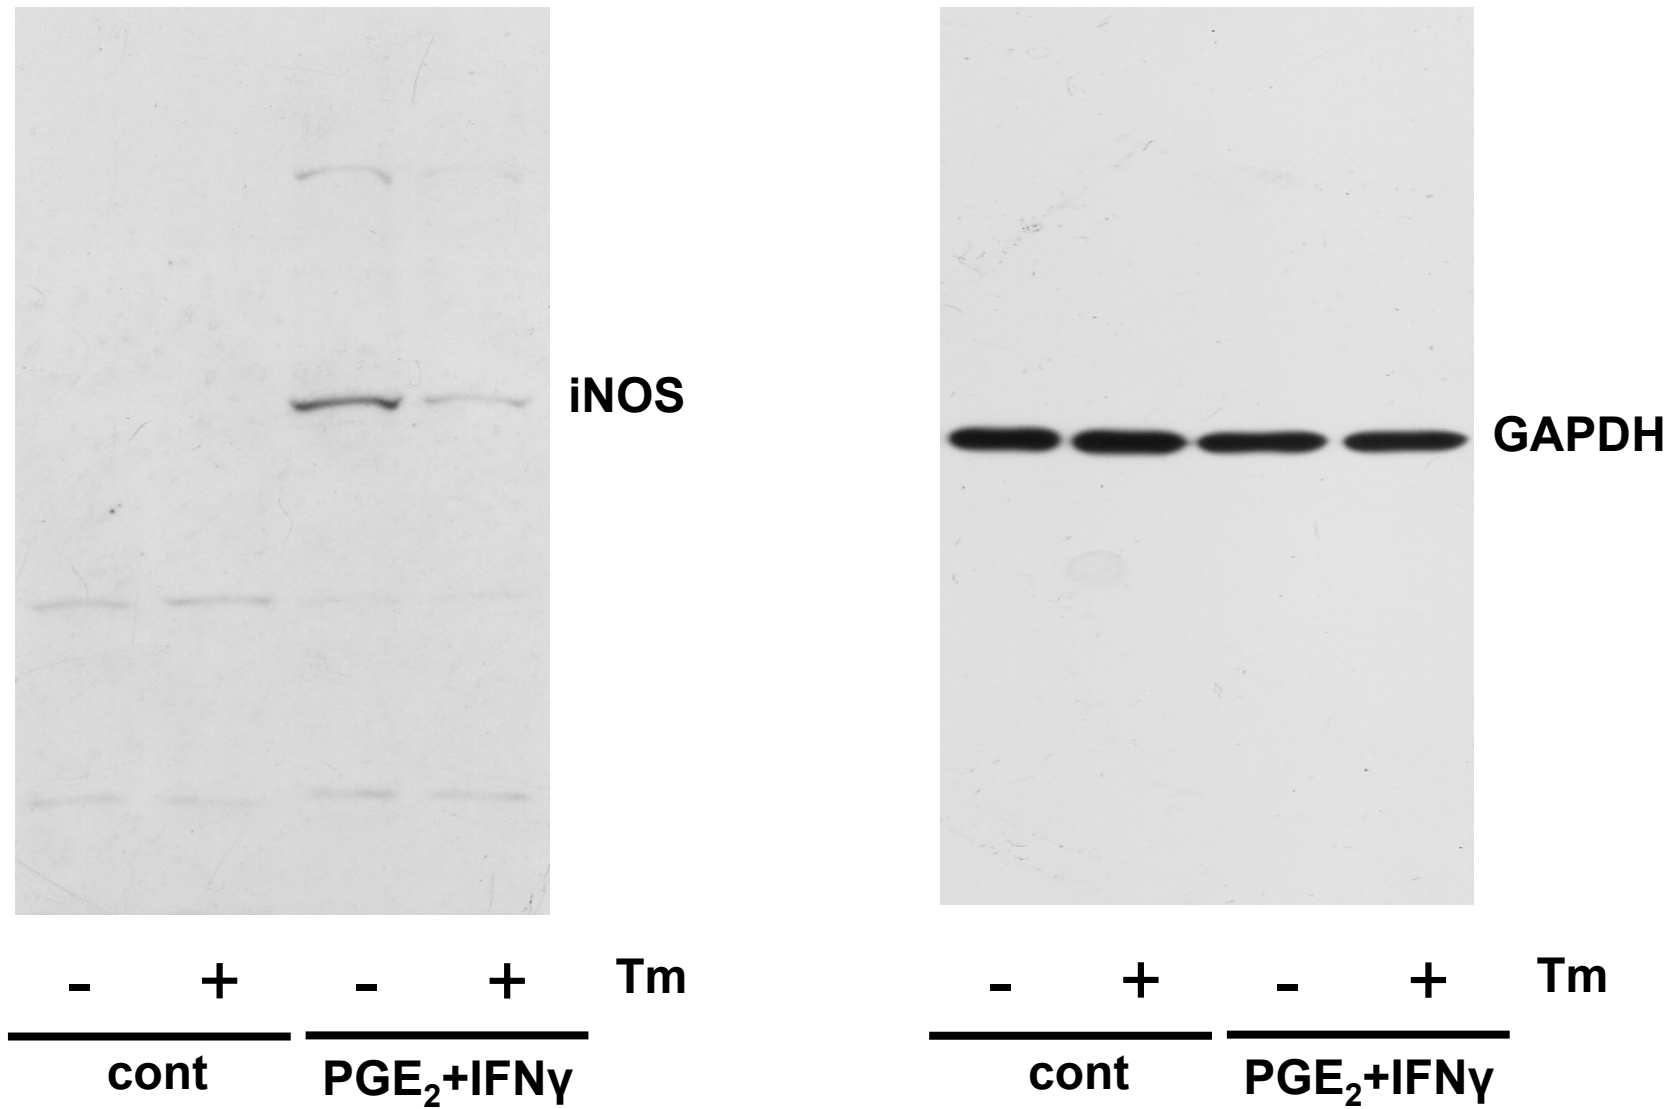

Supplementary Figure S5  
 Full-length unedited blots for Figure 4. Typical Western blotting data of 6 independent experiments was shown.

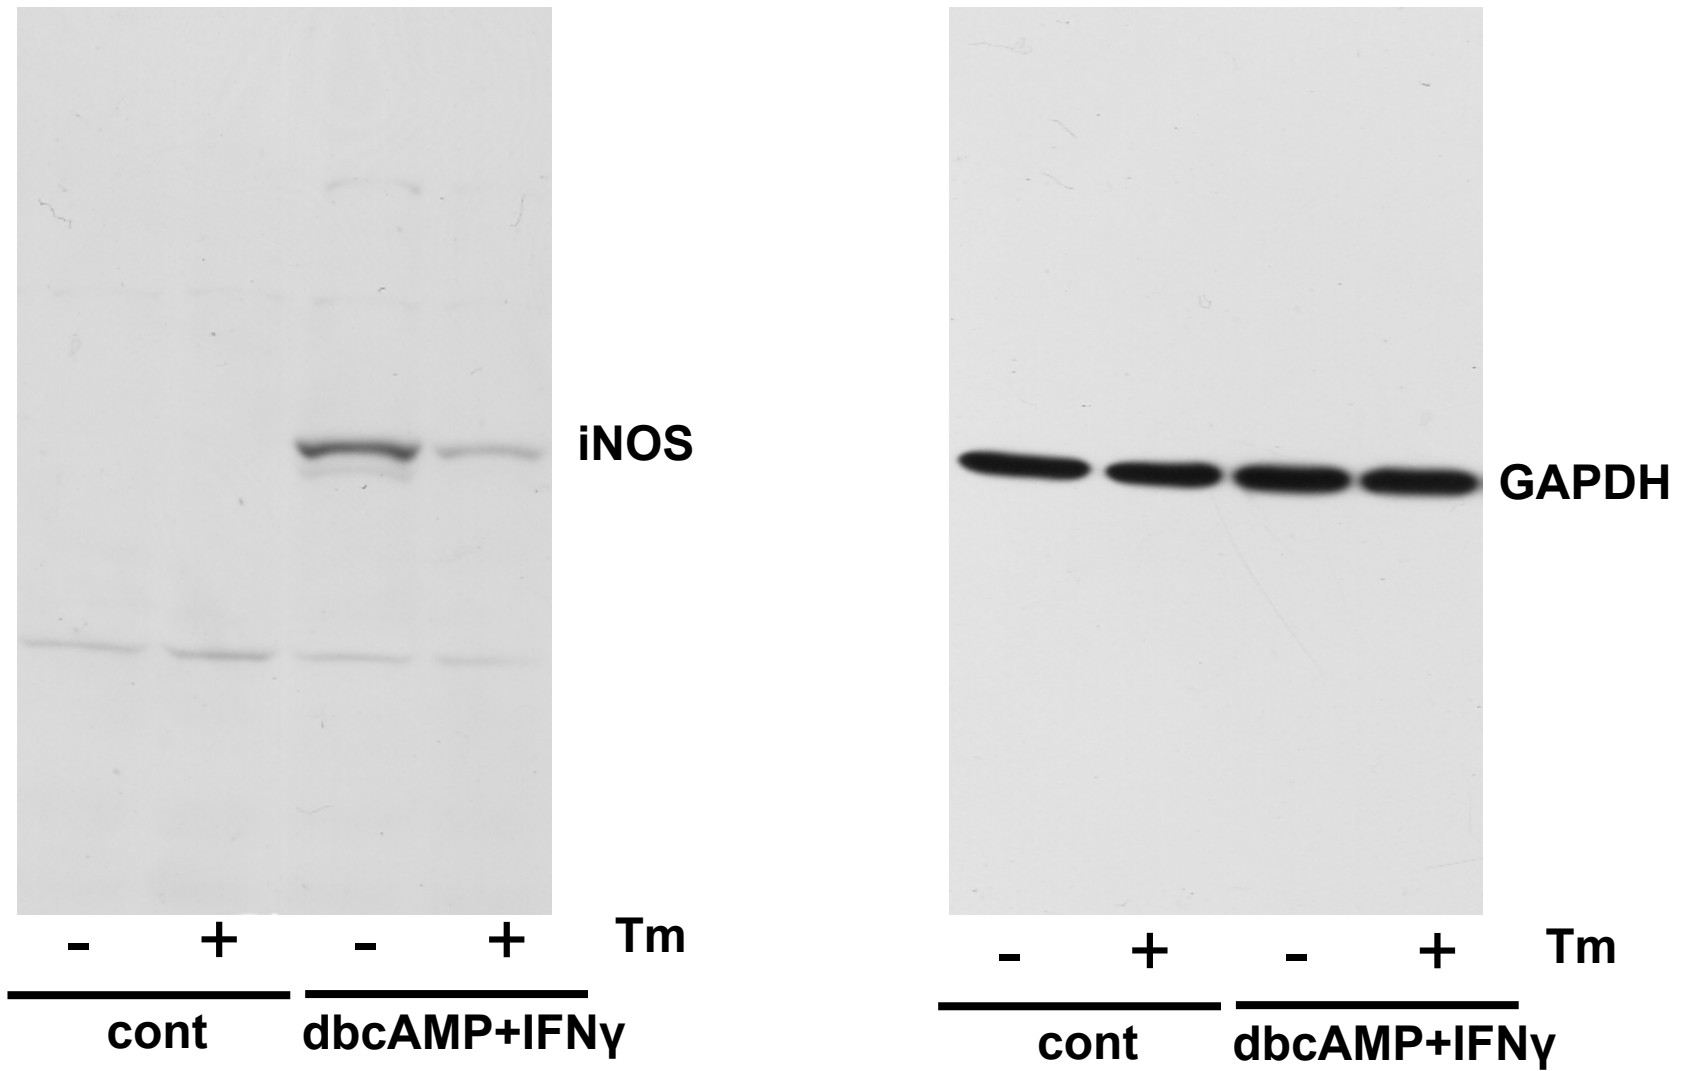

Supplementary Figure S6  
Full-length unedited blots for Figure 5. Typical Western blotting data of 8 independent experiments was shown.
